# Supplementary material
Source: PubMed Central journal article supplement (PMC7269811)
Supplement: NIHMS1580159-supplement-1.pdf [file NIHMS1580159-supplement-1.pdf]

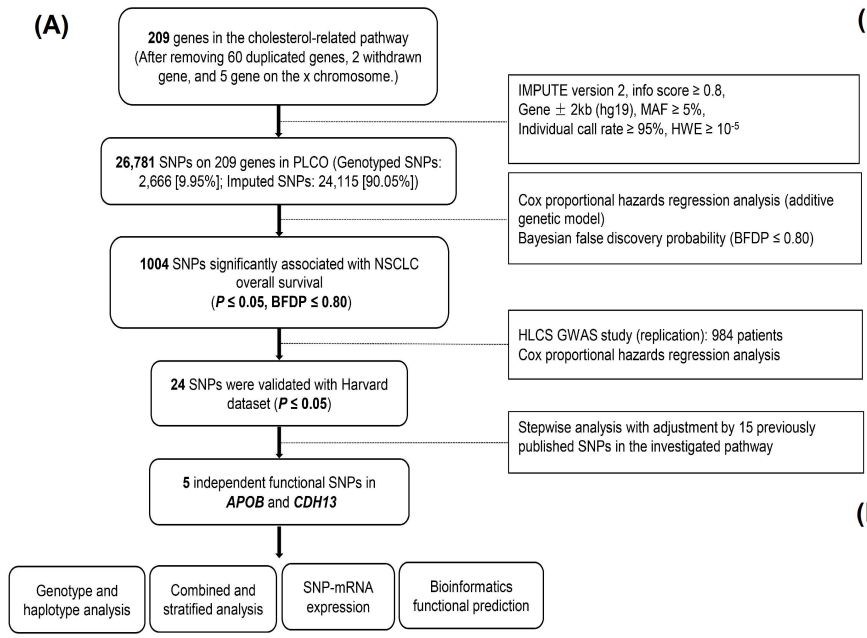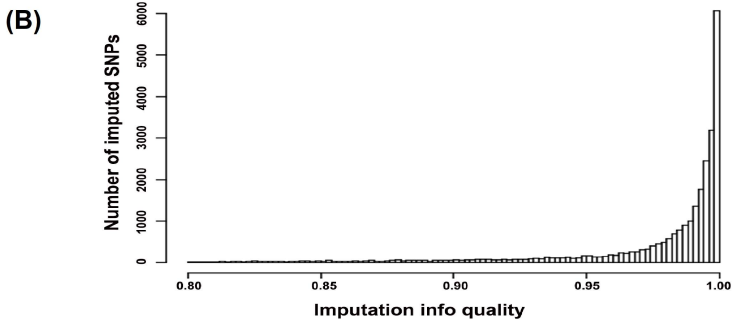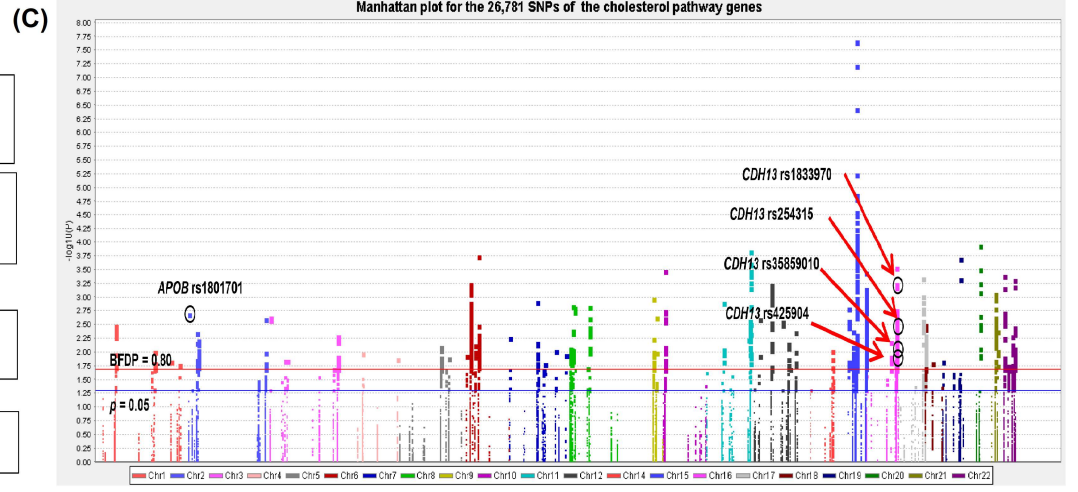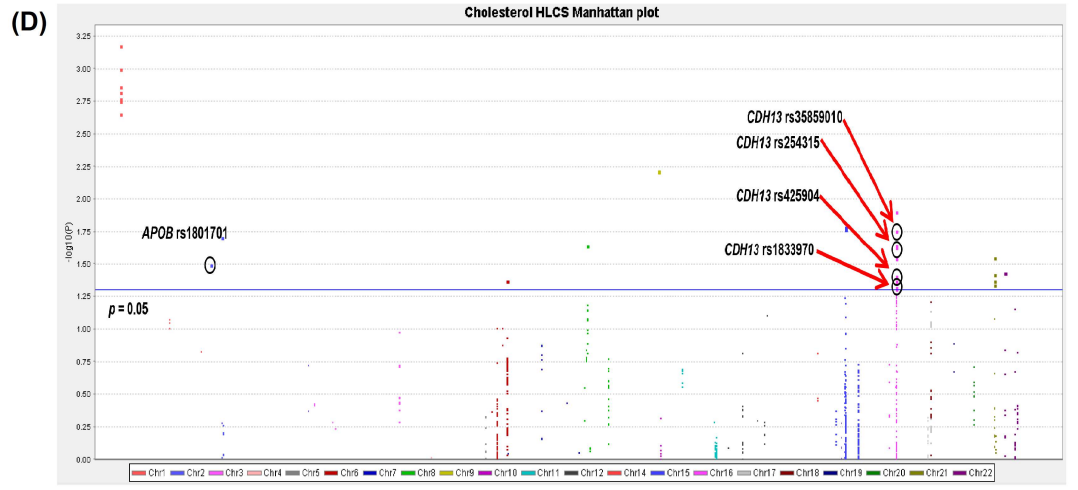

**Supplementary Figure 1.** The flowchart of the present study, distribution of the imputation info score and the Manhattan plot for global viewing of all SNPs in the cholesterol-related genes and the association with NSCLC survival. Abbreviations: SNP, single nucleotide polymorphism; PLCO, the Prostate, Lung, Colorectal and Ovarian Cancer Screening Trial; HLCS, Harvard Lung Cancer Susceptibility. **(A)** The flowchart of the present study. **(B)** Distribution of the imputation info score ( $\geq 0.8$ ) of the present study. **(C)** 26,781 SNPs in the PLCO Trial GWAS dataset. **(D)** Manhattan plot of cholesterol-related genes in the HLCS study dataset. The 22 autosomes were presented in different colors on the x-axis. The values on the y-axis were  $-\log_{10} P$  values of the association of SNPs with NSCLC survival. The blue horizontal line indicates  $P = 0.05$  and the red line indicates  $\text{BFDP} = 0.80$ .
