# Supplementary material
Source: PubMed Central journal article supplement (PMC7269811)
Supplement: NIHMS1580159-supplement-2.pdf [file NIHMS1580159-supplement-2.pdf]

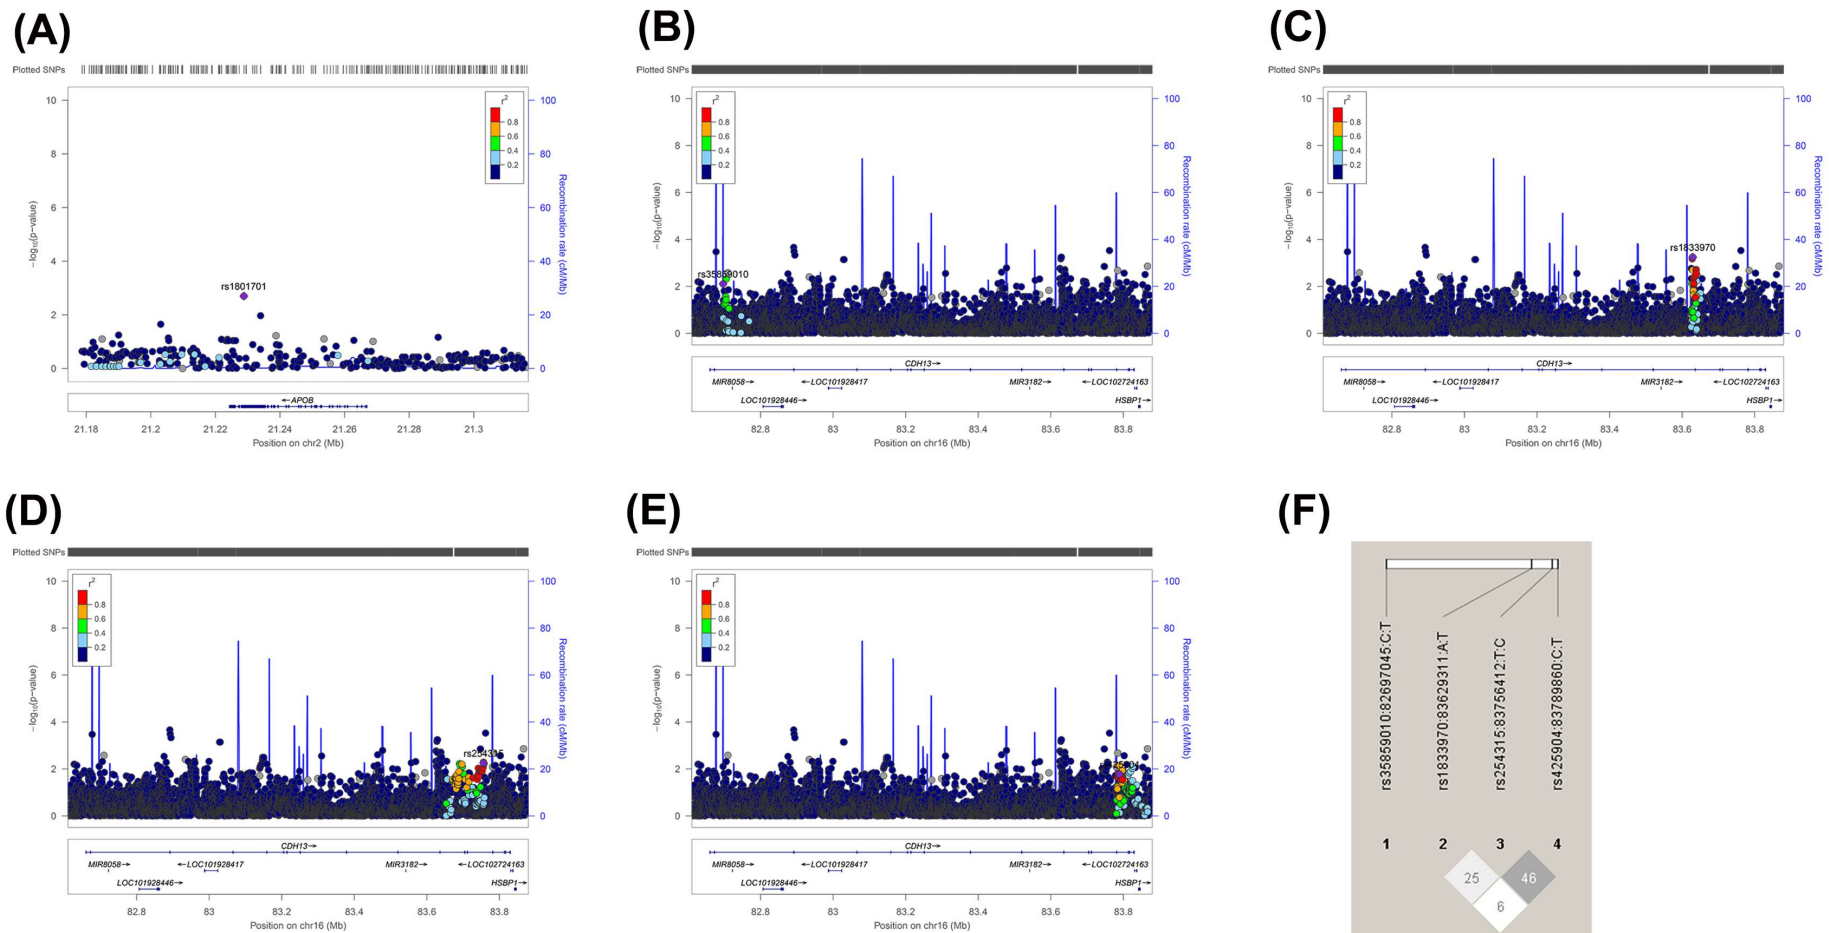

**Supplementary Figure 2.** The regional association plots of five independent SNPs in the cholesterol-related genes SNPs in the region of 50 kilobases up or downstream of **(A)** *APOB* rs1801701\_T C>T, **(B)** *CDH13* rs35859010\_T C>T, **(C)** *CDH13* rs1833970\_A T>A, **(D)** *CDH13* rs254315\_C T>C, **(E)** *CDH13* rs425904\_C T>C. Data points are colored according to the level of linkage disequilibrium of each pair of SNPs based on the hg19/1000 Genomes European population. The left-hand y-axis shows the association P-value of individual SNPs in the discovery dataset, which is plotted as  $-\log_{10}(P)$  against chromosomal base-pair position. The right-hand y-axis shows the recombination rate estimated from HapMap Data Rel 22/phase II European population. **(F)** Linkage disequilibrium block of four SNPs on *CDH13*. The values of R square in the block present the linkage disequilibrium levels of four SNPs on *CDH13*.
