# Supplementary material
Source: PubMed Central journal article supplement (PMC7269811)
Supplement: NIHMS1580159-supplement-3.pdf [file NIHMS1580159-supplement-3.pdf]

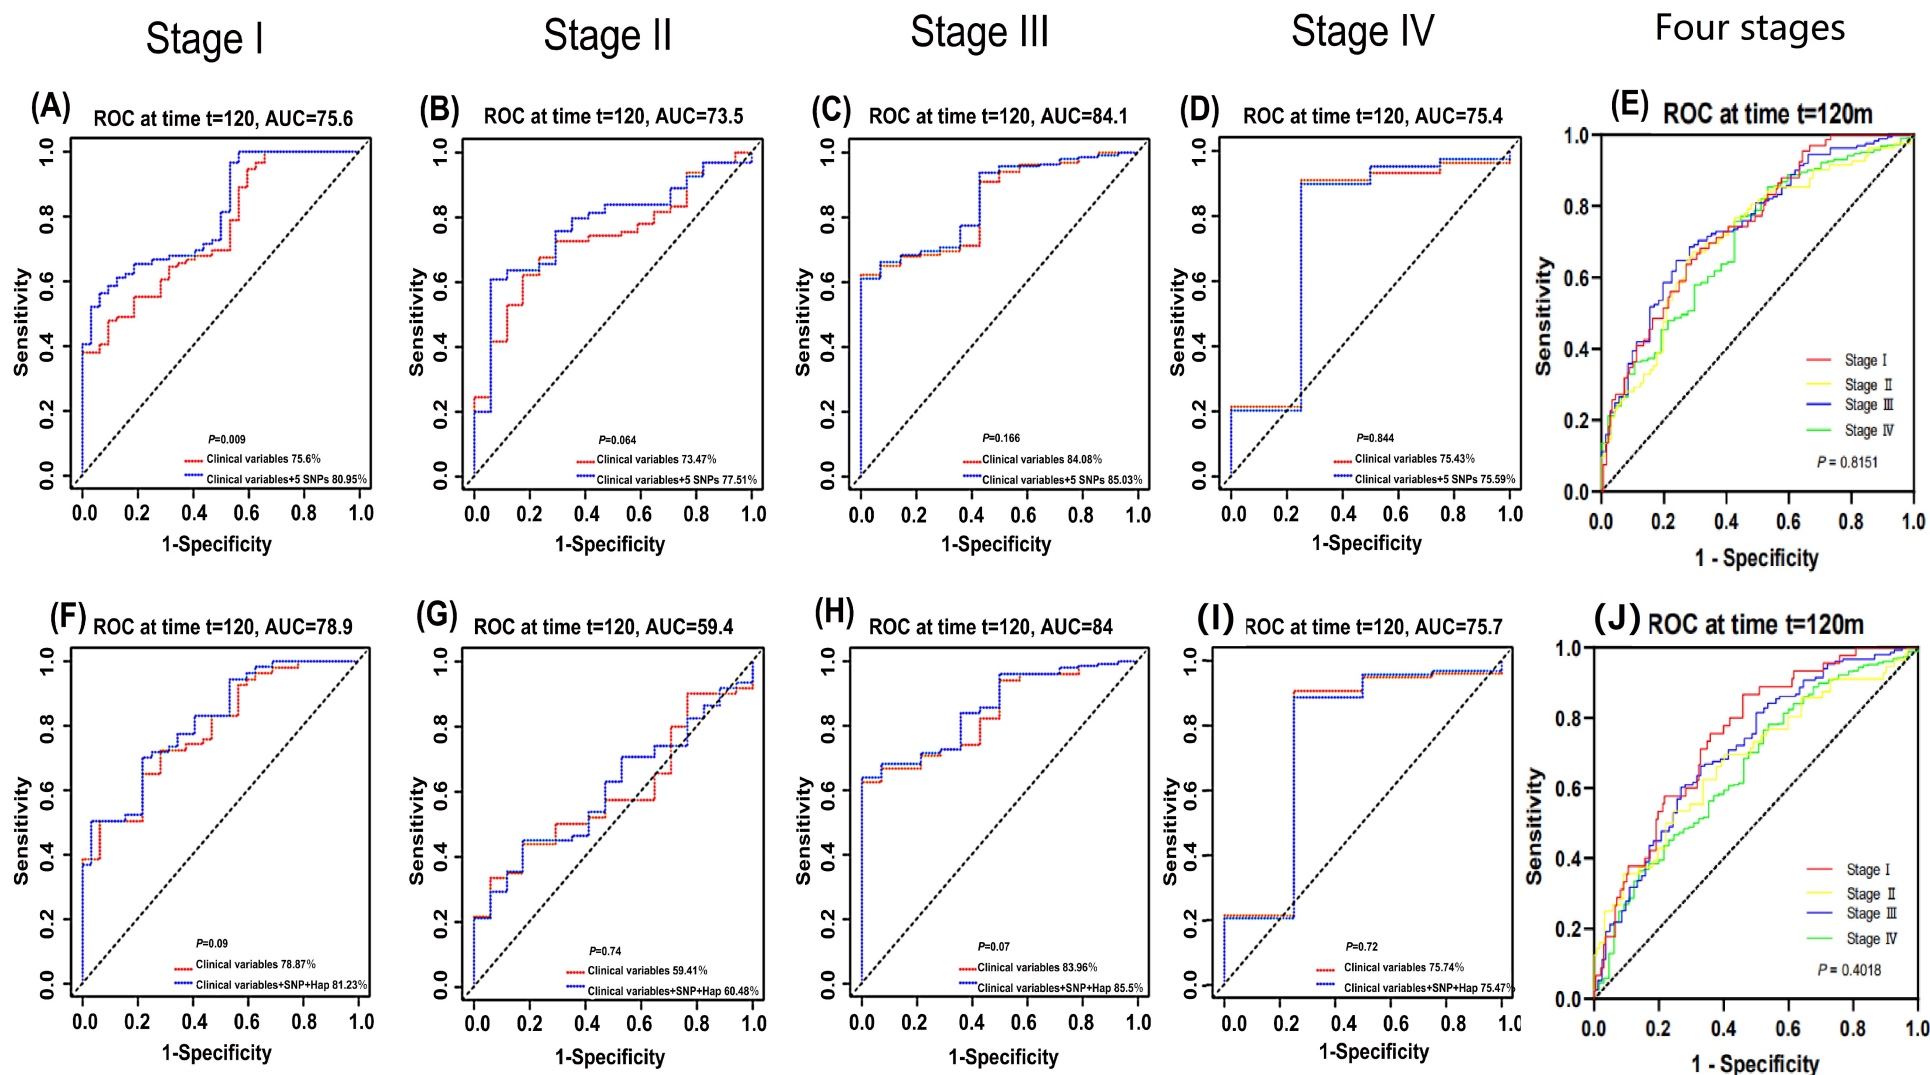

**Supplementary Figure 3.** ROC curves for stage subgroups to estimate the predictive value of the UGH in PLCO Abbreviations: OS: overall survival; DSS: disease-special survival; UGH: unfavorable genotypes/haplotypes. **(A)-(D)** Ten-year NSCLC OS prediction by ROC curve for stage subgroups of I, II, III and IV respectively; **(F)-(I)** Ten-year NSCLC DSS prediction by ROC curve for stage subgroups of I, II, III and IV respectively. **(E)** and **(J)** Comparison among Ten-year NSCLC OS and DSS prediction by ROC curve for stage subgroups of I, II, III and IV. All the P values were  $\geq 0.05$ , when further comparing stage I ( $n=243$ ) with stages II ( $n=178$ ), III ( $n=233$ ) and IV ( $n=521$ ), respectively (0.9393, 0.9999 and 0.7845 for OS; 0.6396, 0.8866 and 0.2352 for DSS).
