# Supplementary material
Source: PubMed Central journal article supplement (PMC7269811)
Supplement: NIHMS1580159-supplement-4.pdf [file NIHMS1580159-supplement-4.pdf]

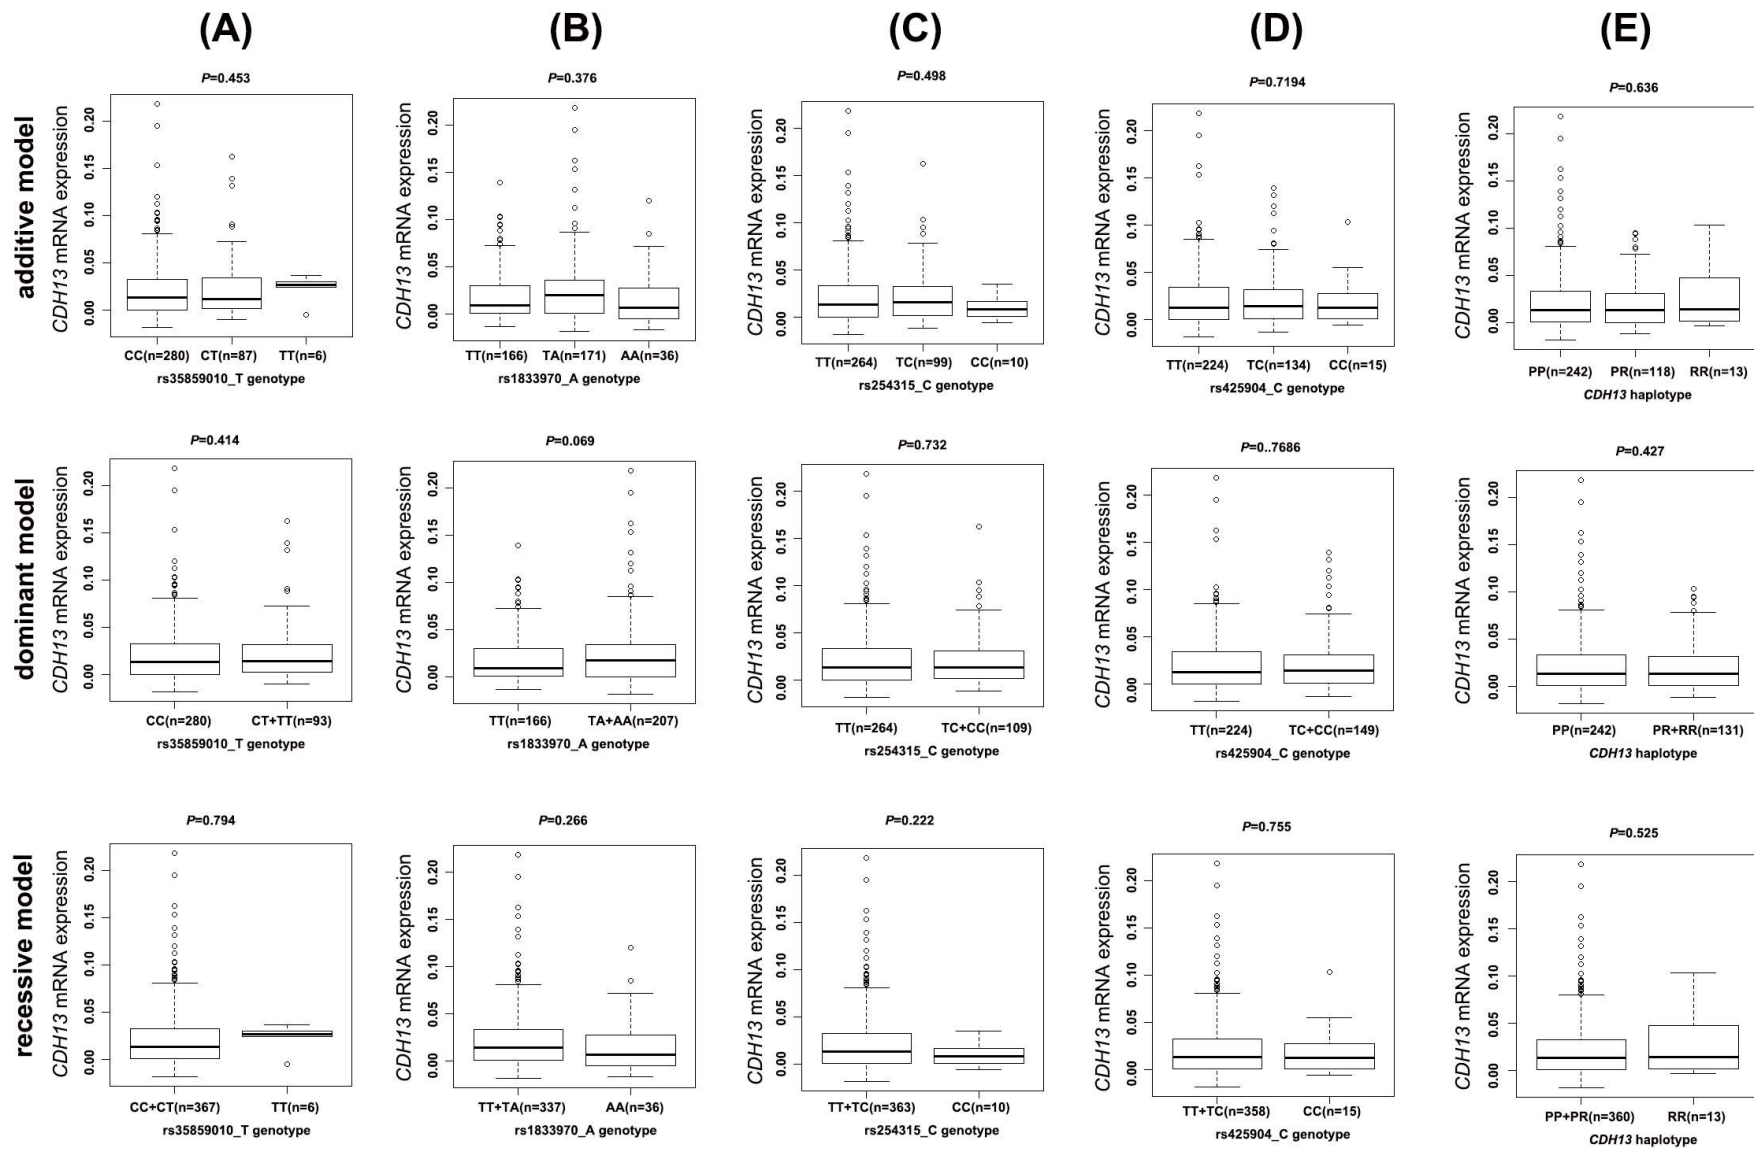

**Supplementary Figure 4.** The eQTL analyses results of four independent SNPs and the haplotype of *CDH13* Abbreviations: eQTL, expression quantitative trait loci analysis. The eQTL for **(A)** *CDH13* rs35859010, **(B)** *CDH13* rs1833970, **(C)** *CDH13* rs254315, **(D)** *CDH13* 358 and **(E)** *CDH13* haplotype in additive, dominant and recessive model in 373 Europeans from the 1000 Genomes Project.
